# Supplementary material for: An intelligent extraction approach of feature information from three-dimensional DAD chromatogram for integrated quality control of traditional Chinese medicines: Gardenia jasminoides root as an example
Source: Royal Society of Chemistry journal article supplement (doi:10.1039/d3ay00437f), 2023-01-01
Supplement: d3ay00437f1.pdf [file d3ay00437f1.pdf]

1     **An Intelligent Extraction Approach of Feature Information from**  
2     **Three-Dimensional DAD Chromatogram for Integrated Quality**  
3     **Control of Traditional Chinese Medicine: *Gardenia Jasminoides* root**  
4                                   **as an example**

5  
6     Hui Zhang<sup>1\*</sup>, Xiaoyi Liu<sup>1</sup>, Yuan Chen<sup>1</sup>, Rui Bai<sup>1</sup>, Hongxu Zhang<sup>1</sup>, Yixia Pan<sup>1</sup>,  
7                                   Jieqiang Zhu<sup>1</sup>, Jizhong Yan<sup>1\*</sup>

8  
9  
10  **Affiliations:**

11  <sup>1</sup> College of Pharmaceutical Science, Zhejiang University of Technology, No. 18,  
12  Chaowang Road, Hangzhou 310014, China

13  
14  **\*Corresponding author:** Associate professor Hui Zhang, Professor Jizhong Yan,  
15  College of Pharmaceutical Science, Zhejiang University of Technology, Hangzhou  
16  310014, China.

17  E-mail address: [zh889@zjut.edu.cn](mailto:zh889@zjut.edu.cn) (Hui Zhang) or [yjz@zjut.edu.cn](mailto:yjz@zjut.edu.cn) (Jizhong Yan).

18  Tel.: 0571-88320984; Fax: 0571-88320984.

**Table S1** Sample information of *Gardenia Jasminoides* root

| No. | Batches      | Geographical regions |
|-----|--------------|----------------------|
| S1  | ZZG-R2006001 | Yunhe, Zhejiang      |
| S2  | ZZG-R2006002 | Jingning, Zhejiang   |
| S3  | ZZG-R2006003 | Jingning, Zhejiang   |
| S4  | ZZG-R2006004 | Qingtian, Zhejiang   |
| S5  | ZZG-R2006005 | Qingtian, Zhejiang   |
| S6  | ZZG-R2006006 | Jingning, Zhejiang   |
| S7  | ZZG-R2006007 | Jingning, Zhejiang   |
| S8  | ZZG-R2006008 | Lishui, Zhejiang     |
| S9  | ZZG-R2006009 | Yunhe, Zhejiang      |
| S10 | ZZG-R2006010 | Qingtian, Zhejiang   |
| S11 | ZZG-R2006011 | Lishui, Zhejiang     |
| S12 | ZZG-R2006012 | Lishui, Zhejiang     |
| S13 | ZZG-R2006013 | Lishui, Zhejiang     |
| S14 | ZZG-R2006014 | Sanming, Fujian      |
| S15 | ZZG-R2006015 | Sanming, Fujian      |
| S16 | ZZG-R2006016 | Sanming, Fujian      |
| S17 | ZZG-R2006017 | Meizhou, Guangdong   |
| S18 | ZZG-R2006018 | Meizhou, Guangdong   |
| S19 | ZZG-R2006019 | Meizhou, Guangdong   |
| S20 | ZZG-R2006020 | Meizhou, Guangdong   |
| S21 | ZZG-R2006021 | Yulin, Guangxi       |
| S22 | ZZG-R2006022 | Yulin, Guangxi       |
| S23 | ZZG-R2006023 | Yulin, Guangxi       |
| S24 | ZZG-R2006024 | Jiujiang, Jiangxi    |
| S25 | ZZG-R2006025 | Jiujiang, Jiangxi    |
| S26 | ZZG-R2006026 | Jiujiang, Jiangxi    |
| S27 | ZZG-R2006027 | Bozhou, Anhui        |

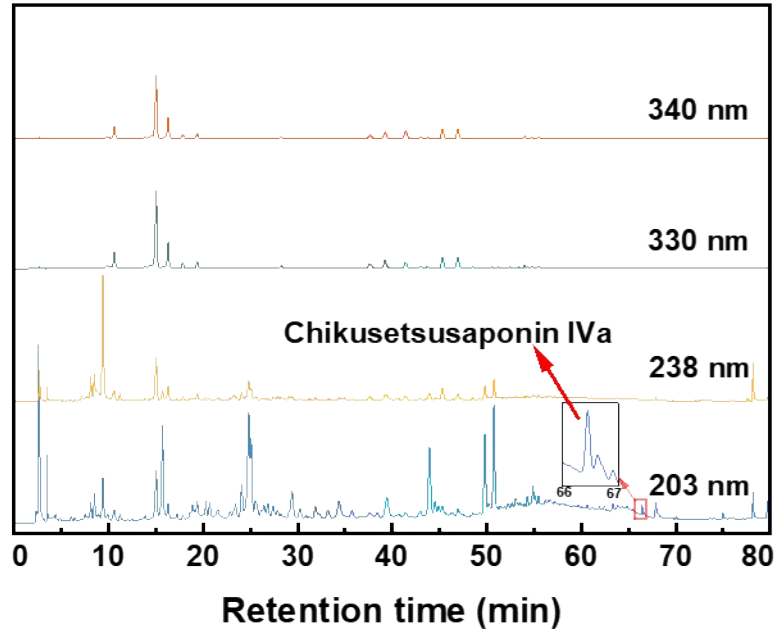

**Fig. S1.** Chromatograms in different wavelengths with *Gardenia Jasminoides* root.

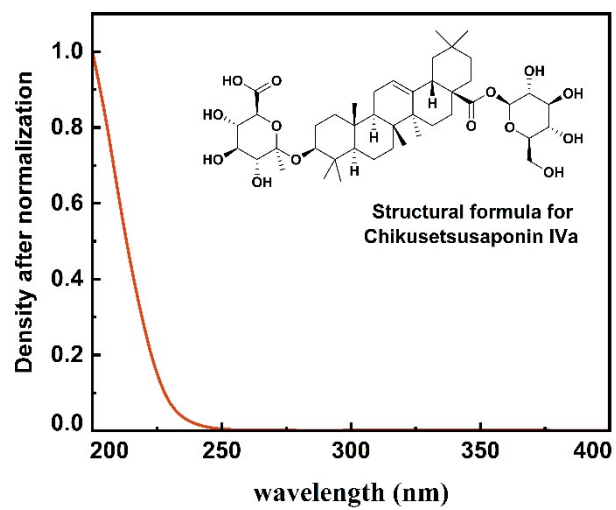

**Fig. S2.** The UV absorption spectrum and structural formula of Chikusetsusaponin IVa.

**Table S2** Linear regression equation

| Approach                      | Regression equation   | R <sup>2</sup> |
|-------------------------------|-----------------------|----------------|
| Single-wavelength fingerprint | $y = 3.7659x + 6.199$ | 0.9999         |
| BFD                           | $y = 0.0699x + 0.152$ | 0.9999         |

**Table S3** The results of RT and peak area from single-wavelength fingerprint and BFD

| No.     | Single-wavelength fingerprint<br>(n=6) |        | BFD<br>(n=6) |       |
|---------|----------------------------------------|--------|--------------|-------|
|         | RT (min)                               | S      | RT (min)     | S     |
| 1       | 65.78                                  | 559.60 | 65.78        | 10.59 |
| 2       | 65.89                                  | 543.00 | 65.89        | 10.85 |
| 3       | 66.03                                  | 566.90 | 66.03        | 11.02 |
| 4       | 65.92                                  | 578.00 | 65.92        | 10.89 |
| 5       | 66.00                                  | 577.10 | 66.00        | 11.37 |
| 6       | 66.12                                  | 562.90 | 66.12        | 10.74 |
| Average | 65.96                                  | 564.58 | 65.96        | 10.91 |
| RSD (%) | 0.18                                   | 2.29   | 0.18         | 2.46  |

RT: retention time

S: peak area

RSD: relative standard deviation

**Table S4** RT and common peak areas of 27 batches in 203nm HPLC fingerprints

| No. | RT<br>(min) | S1    | S1    | S2    | S3    | S4    | S5    | S6    | S7    | S8    | S9    | S10   | S11   | S12   | S13   | S14   | S15   | S16   | S17   | S18   | S19   | S20   | S21   | S22  | S23  | S24  | S25  | S26  | S27   |
|-----|-------------|-------|-------|-------|-------|-------|-------|-------|-------|-------|-------|-------|-------|-------|-------|-------|-------|-------|-------|-------|-------|-------|-------|------|------|------|------|------|-------|
| 1   | 2.35        | 13.7  | 13.0  | 22.2  | 23.5  | 21.4  | 19.8  | 14.4  | 14.2  | 32.6  | 30.6  | 24.2  | 19.4  | 23.1  | 13.7  | 8.9   | 14.6  | 18.6  | 18.0  | 15.9  | 6.1   | 3.4   | 7.1   | 0.0  | 37.1 | 34.0 | 30.9 | 21.5 | 2.35  |
| 2   | 2.58        | 83.9  | 42.0  | 43.7  | 48.2  | 52.0  | 45.8  | 43.6  | 38.3  | 51.6  | 46.7  | 43.9  | 36.9  | 48.1  | 25.1  | 21.7  | 30.3  | 45.0  | 31.1  | 46.6  | 27.0  | 12.1  | 14.4  | 65.9 | 37.5 | 33.2 | 28.9 | 25.7 | 2.58  |
| 3   | 2.71        | 92.8  | 60.0  | 61.3  | 60.7  | 60.9  | 55.0  | 49.9  | 56.1  | 70.6  | 66.2  | 63.0  | 66.9  | 58.7  | 48.3  | 41.4  | 64.3  | 49.6  | 77.6  | 46.3  | 46.0  | 44.0  | 44.8  | 72.5 | 61.2 | 55.4 | 56.1 | 65.4 | 2.71  |
| 4   | 3.49        | 28.4  | 16.5  | 17.5  | 17.0  | 16.6  | 16.5  | 15.0  | 16.3  | 20.4  | 19.8  | 17.6  | 15.5  | 16.7  | 9.2   | 7.2   | 10.9  | 13.4  | 17.2  | 7.9   | 6.8   | 11.0  | 5.5   | 13.1 | 13.0 | 12.9 | 7.3  | 13.6 | 3.49  |
| 5   | 10.63       | 17.9  | 15.6  | 19.1  | 15.6  | 15.7  | 14.6  | 13.9  | 16.4  | 19.3  | 15.8  | 17.4  | 16.2  | 18.1  | 14.8  | 10.4  | 20.0  | 18.5  | 20.5  | 16.2  | 13.2  | 20.8  | 24.1  | 39.3 | 26.4 | 20.2 | 19.9 | 9.0  | 10.63 |
| 6   | 11.22       | 7.6   | 6.5   | 7.1   | 6.3   | 6.6   | 7.2   | 6.2   | 7.4   | 7.1   | 5.6   | 6.9   | 5.8   | 6.4   | 2.4   | 5.8   | 2.2   | 17.4  | 1.6   | 0.6   | 1.0   | 8.6   | 1.5   | 5.1  | 8.3  | 8.8  | 7.2  | 0.0  | 11.22 |
| 7   | 15.04       | 62.9  | 45.7  | 49.0  | 53.7  | 51.8  | 45.8  | 36.4  | 50.2  | 78.2  | 60.3  | 50.4  | 47.2  | 49.8  | 47.5  | 31.8  | 44.9  | 20.8  | 36.5  | 22.7  | 29.0  | 33.5  | 28.5  | 36.0 | 22.8 | 22.6 | 31.1 | 24.5 | 15.04 |
| 8   | 15.71       | 102.6 | 81.5  | 85.2  | 93.2  | 88.4  | 84.4  | 85.2  | 81.4  | 108.3 | 102.5 | 81.5  | 75.1  | 88.0  | 67.9  | 43.5  | 47.6  | 79.5  | 80.0  | 70.5  | 50.7  | 59.4  | 91.9  | 73.3 | 47.2 | 40.1 | 53.1 | 82.7 | 15.71 |
| 9   | 16.31       | 16.9  | 10.8  | 13.8  | 15.0  | 12.2  | 10.9  | 10.9  | 15.0  | 23.4  | 12.0  | 11.8  | 14.2  | 15.5  | 13.2  | 10.6  | 23.8  | 15.3  | 21.8  | 12.5  | 12.8  | 11.1  | 7.1   | 4.2  | 10.8 | 12.2 | 12.3 | 6.4  | 16.31 |
| 10  | 24.09       | 41.3  | 26.1  | 25.5  | 32.8  | 22.6  | 25.8  | 27.5  | 19.6  | 26.2  | 22.9  | 25.1  | 21.5  | 24.0  | 13.3  | 29.9  | 42.0  | 30.3  | 30.9  | 23.0  | 18.9  | 5.8   | 3.5   | 41.2 | 28.5 | 21.6 | 41.3 | 5.4  | 24.09 |
| 11  | 24.82       | 139.7 | 160.2 | 129.9 | 138.1 | 128.5 | 120.4 | 120.2 | 155.9 | 160.2 | 141.2 | 164.8 | 142.2 | 147.1 | 131.7 | 105.7 | 140.6 | 106.5 | 147.6 | 122.1 | 128.3 | 183.5 | 120.6 | 46.2 | 80.7 | 68.6 | 54.6 | 33.1 | 24.82 |
| 12  | 39.47       | 48.6  | 37.8  | 42.5  | 43.1  | 35.1  | 32.0  | 34.1  | 40.8  | 46.3  | 40.6  | 36.4  | 38.8  | 37.8  | 25.6  | 23.4  | 16.6  | 14.0  | 13.2  | 27.5  | 26.8  | 12.8  | 20.6  | 13.5 | 12.3 | 27.4 | 18.5 | 16.1 | 39.47 |
| 13  | 43.96       | 112.1 | 87.6  | 95.9  | 112.0 | 90.6  | 93.2  | 97.6  | 86.2  | 111.9 | 105.6 | 89.0  | 82.4  | 91.9  | 138.5 | 87.7  | 159.1 | 56.2  | 43.5  | 53.2  | 107.0 | 58.8  | 27.0  | 32.5 | 54.4 | 45.3 | 50.0 | 39.9 | 43.96 |
| 14  | 46.97       | 12.5  | 13.1  | 24.1  | 22.9  | 12.9  | 10.5  | 11.6  | 20.7  | 18.0  | 22.0  | 21.0  | 21.7  | 15.2  | 28.7  | 10.0  | 18.7  | 6.2   | 17.4  | 9.2   | 8.4   | 23.4  | 3.6   | 9.7  | 13.1 | 17.0 | 19.8 | 12.4 | 46.97 |
| 15  | 49.81       | 105.0 | 88.6  | 98.1  | 107.7 | 95.2  | 91.4  | 92.4  | 86.1  | 103.1 | 96.6  | 85.5  | 87.5  | 89.4  | 103.8 | 46.5  | 120.8 | 32.9  | 50.0  | 27.4  | 75.3  | 65.2  | 27.9  | 26.8 | 46.5 | 37.9 | 36.0 | 3.9  | 49.81 |
| 16  | 50.77       | 117.6 | 83.2  | 82.1  | 107.5 | 88.2  | 78.5  | 88.5  | 73.6  | 103.2 | 107.1 | 76.4  | 70.1  | 82.9  | 99.8  | 45.7  | 90.5  | 52.0  | 54.9  | 25.7  | 87.3  | 54.7  | 18.3  | 29.1 | 37.6 | 34.5 | 32.9 | 1.3  | 50.77 |
| 17  | 54.90       | 22.9  | 20.0  | 17.3  | 18.7  | 18.1  | 17.6  | 14.6  | 17.4  | 10.0  | 20.7  | 18.4  | 16.8  | 17.5  | 20.0  | 11.2  | 23.7  | 16.7  | 15.1  | 13.5  | 19.5  | 8.4   | 9.3   | 10.7 | 16.9 | 14.8 | 9.2  | 2.5  | 54.90 |
| 18  | 66.45       | 5.5   | 3.7   | 4.3   | 4.7   | 3.4   | 3.6   | 4.6   | 3.9   | 3.9   | 3.4   | 4.7   | 3.6   | 4.0   | 11.9  | 7.8   | 6.0   | 14.8  | 10.0  | 10.1  | 11.9  | 1.2   | 2.2   | 9.4  | 8.8  | 8.6  | 8.1  | 6.5  | 66.45 |
| 19  | 67.88       | 27.9  | 29.2  | 29.4  | 30.4  | 28.2  | 27.8  | 26.8  | 28.1  | 28.4  | 28.6  | 28.1  | 29.1  | 28.2  | 0.5   | 1.1   | 1.3   | 0.8   | 1.2   | 0.9   | 1.2   | 1.9   | 0.6   | 1.5  | 0.8  | 1.3  | 0.6  | 12.4 | 67.88 |
| 20  | 70.08       | 2.3   | 1.6   | 1.7   | 2.0   | 1.4   | 1.3   | 1.8   | 1.6   | 1.7   | 1.5   | 2.1   | 1.6   | 1.6   | 2.2   | 1.4   | 1.5   | 2.1   | 1.9   | 2.6   | 2.7   | 0.4   | 0.6   | 3.5  | 1.8  | 1.4  | 3.2  | 2.4  | 70.08 |
| 21  | 75.01       | 5.6   | 6.1   | 6.0   | 1.4   | 5.5   | 5.3   | 5.2   | 5.2   | 5.1   | 5.2   | 5.2   | 5.2   | 5.2   | 0.5   | 0.5   | 0.8   | 1.2   | 2.9   | 2.0   | 1.0   | 0.7   | 0.2   | 1.5  | 1.0  | 1.6  | 1.3  | 0.9  | 75.01 |
| 22  | 78.19       | 31.4  | 30.1  | 29.1  | 29.3  | 28.5  | 29.5  | 29.1  | 30.0  | 40.6  | 31.2  | 29.6  | 29.7  | 30.2  | 8.3   | 7.6   | 7.4   | 22.8  | 4.1   | 7.7   | 8.6   | 25.0  | 9.9   | 8.4  | 24.9 | 24.7 | 8.1  | 12.9 | 78.19 |

|    |       |      |      |      |      |      |      |      |      |      |      |      |      |      |     |     |     |      |     |     |     |      |     |     |      |      |     |     |       |
|----|-------|------|------|------|------|------|------|------|------|------|------|------|------|------|-----|-----|-----|------|-----|-----|-----|------|-----|-----|------|------|-----|-----|-------|
| 23 | 79.75 | 19.4 | 20.1 | 20.4 | 19.8 | 19.6 | 19.6 | 19.7 | 20.0 | 19.7 | 20.0 | 20.4 | 20.3 | 20.9 | 4.4 | 4.5 | 4.9 | 11.4 | 3.0 | 4.8 | 4.5 | 11.3 | 3.4 | 4.8 | 10.9 | 11.0 | 5.7 | 4.5 | 79.75 |
|----|-------|------|------|------|------|------|------|------|------|------|------|------|------|------|-----|-----|-----|------|-----|-----|-----|------|-----|-----|------|------|-----|-----|-------|

**Table S5** RT and common peak areas of 27 batches in BFD

| No. | RT<br>(min) | S1 to S27 |       |       |       |       |       |       |       |       |       |       |       |       |       |       |       |       |       |       |       |       |       |       |       |       |       |      |       |
|-----|-------------|-----------|-------|-------|-------|-------|-------|-------|-------|-------|-------|-------|-------|-------|-------|-------|-------|-------|-------|-------|-------|-------|-------|-------|-------|-------|-------|------|-------|
|     |             | S1        | S1    | S2    | S3    | S4    | S5    | S6    | S7    | S8    | S9    | S10   | S11   | S12   | S13   | S14   | S15   | S16   | S17   | S18   | S19   | S20   | S21   | S22   | S23   | S24   | S25   | S26  | S27   |
| 1   | 2.35        | 15.1      | 23.0  | 26.0  | 28.2  | 25.6  | 24.0  | 24.3  | 24.8  | 40.1  | 38.3  | 28.3  | 22.6  | 27.1  | 16.2  | 10.6  | 18.0  | 23.1  | 20.2  | 19.1  | 6.8   | 4.2   | 8.7   | 0.0   | 49.0  | 45.0  | 39.7  | 26.9 | 2.35  |
| 2   | 2.58        | 91.6      | 50.1  | 52.5  | 57.6  | 60.4  | 54.8  | 53.2  | 46.9  | 62.3  | 56.6  | 53.5  | 45.1  | 57.7  | 35.8  | 29.6  | 37.3  | 28.6  | 29.9  | 26.3  | 36.5  | 16.7  | 22.6  | 20.3  | 24.0  | 26.0  | 26.2  | 29.7 | 2.58  |
| 3   | 2.71        | 83.8      | 62.7  | 63.8  | 62.4  | 63.4  | 56.5  | 51.2  | 58.5  | 73.7  | 68.8  | 66.5  | 61.0  | 61.8  | 52.7  | 43.8  | 68.8  | 48.7  | 93.5  | 48.2  | 44.6  | 47.5  | 47.7  | 80.4  | 62.9  | 56.2  | 59.8  | 74.6 | 2.71  |
| 4   | 3.49        | 29.2      | 17.2  | 18.0  | 17.5  | 17.2  | 17.0  | 15.7  | 16.9  | 20.8  | 20.0  | 18.0  | 15.9  | 17.1  | 9.8   | 7.7   | 11.4  | 13.8  | 18.1  | 8.0   | 7.0   | 11.0  | 5.9   | 13.5  | 12.9  | 12.8  | 7.7   | 13.8 | 3.49  |
| 5   | 6.06        | 7.9       | 6.4   | 6.3   | 6.4   | 6.2   | 6.0   | 7.1   | 5.6   | 7.6   | 7.1   | 7.2   | 5.6   | 7.4   | 3.6   | 0.0   | 4.8   | 0.0   | 11.8  | 5.3   | 4.8   | 0.0   | 3.2   | 9.6   | 8.9   | 6.5   | 7.0   | 16.2 | 6.06  |
| 6   | 6.43        | 4.9       | 0.0   | 0.0   | 0.0   | 0.0   | 0.0   | 5.0   | 0.0   | 5.7   | 5.3   | 5.2   | 0.0   | 5.6   | 0.0   | 0.0   | 0.0   | 0.0   | 4.6   | 3.4   | 0.0   | 0.0   | 0.0   | 0.0   | 0.0   | 0.0   | 0.0   | 0.0  | 6.43  |
| 7   | 9.41        | 133.5     | 68.7  | 77.8  | 74.5  | 62.6  | 65.5  | 59.5  | 65.8  | 79.5  | 62.5  | 85.3  | 64.2  | 72.8  | 53.1  | 58.5  | 40.7  | 21.3  | 41.1  | 118.0 | 73.1  | 267.0 | 274.5 | 180.3 | 192.5 | 166.2 | 205.0 | 26.2 | 9.41  |
| 8   | 11.21       | 6.3       | 7.7   | 8.5   | 8.5   | 9.4   | 8.7   | 8.2   | 8.5   | 8.8   | 7.0   | 9.0   | 7.3   | 8.2   | 0.0   | 0.0   | 0.0   | 0.0   | 0.0   | 6.3   | 4.2   | 10.5  | 0.0   | 7.5   | 8.8   | 9.3   | 9.2   | 7.9  | 11.21 |
| 9   | 15.04       | 90.9      | 52.6  | 56.7  | 57.5  | 62.0  | 53.5  | 41.7  | 60.8  | 95.2  | 71.1  | 58.5  | 56.1  | 60.2  | 63.4  | 40.2  | 49.3  | 29.5  | 49.2  | 28.0  | 38.3  | 48.6  | 37.7  | 32.4  | 30.6  | 31.5  | 44.9  | 25.0 | 15.04 |
| 10  | 15.71       | 102.8     | 79.2  | 83.6  | 89.3  | 86.0  | 83.1  | 84.9  | 79.5  | 108.5 | 103.0 | 80.4  | 74.8  | 84.0  | 65.6  | 41.9  | 43.0  | 73.4  | 79.1  | 69.4  | 50.5  | 61.0  | 87.0  | 64.8  | 43.2  | 37.0  | 51.0  | 81.4 | 15.71 |
| 11  | 16.31       | 22.1      | 21.8  | 25.9  | 22.4  | 22.9  | 21.5  | 19.9  | 24.8  | 33.0  | 25.0  | 24.8  | 23.1  | 20.7  | 23.2  | 17.0  | 31.9  | 25.1  | 35.1  | 21.8  | 22.1  | 20.7  | 14.7  | 7.3   | 17.7  | 17.8  | 22.1  | 9.1  | 16.31 |
| 12  | 17.25       | 7.9       | 6.9   | 7.3   | 7.3   | 4.7   | 7.0   | 7.9   | 5.3   | 7.1   | 7.4   | 6.0   | 5.1   | 7.4   | 8.0   | 7.1   | 9.6   | 8.7   | 6.9   | 8.6   | 6.5   | 0.0   | 0.0   | 12.2  | 0.0   | 0.0   | 0.0   | 7.7  | 17.25 |
| 13  | 17.85       | 7.9       | 9.7   | 10.0  | 10.0  | 6.3   | 8.0   | 8.7   | 7.9   | 6.6   | 6.0   | 8.4   | 6.6   | 9.0   | 9.4   | 6.3   | 8.0   | 7.4   | 11.4  | 12.5  | 15.6  | 6.8   | 0.0   | 12.5  | 7.3   | 6.7   | 8.0   | 0.0  | 17.85 |
| 14  | 20.71       | 17.2      | 15.8  | 16.8  | 19.9  | 16.7  | 15.8  | 14.9  | 14.3  | 18.5  | 17.8  | 17.0  | 14.3  | 15.2  | 14.0  | 7.8   | 34.6  | 11.0  | 14.4  | 10.9  | 10.5  | 24.3  | 7.5   | 8.0   | 8.8   | 10.8  | 12.8  | 17.9 | 20.71 |
| 15  | 24.09       | 40.2      | 25.9  | 25.3  | 32.5  | 22.1  | 26.6  | 28.5  | 20.8  | 25.0  | 22.8  | 25.0  | 7.7   | 24.5  | 18.7  | 39.1  | 54.3  | 34.7  | 35.1  | 19.3  | 25.7  | 8.2   | 6.1   | 43.7  | 35.4  | 26.8  | 42.7  | 9.7  | 24.09 |
| 16  | 24.82       | 137.9     | 164.0 | 125.6 | 138.6 | 121.7 | 115.7 | 115.6 | 158.6 | 155.8 | 138.3 | 165.5 | 144.9 | 152.4 | 130.2 | 106.8 | 141.1 | 111.3 | 149.6 | 124.9 | 131.1 | 196.6 | 122.0 | 49.8  | 80.9  | 69.6  | 56.5  | 33.7 | 24.82 |
| 17  | 25.09       | 84.1      | 0.0   | 38.1  | 41.8  | 36.5  | 38.1  | 32.9  | 0.0   | 54.2  | 51.8  | 0.0   | 0.0   | 0.0   | 47.5  | 39.6  | 13.1  | 0.0   | 20.8  | 50.0  | 80.4  | 0.0   | 49.4  | 0.0   | 0.0   | 0.0   | 0.0   | 0.0  | 25.09 |
| 18  | 26.45       | 17.3      | 14.5  | 15.7  | 18.8  | 15.5  | 14.8  | 16.7  | 12.6  | 17.8  | 17.6  | 14.1  | 11.1  | 14.5  | 17.6  | 16.0  | 22.1  | 11.8  | 12.9  | 14.4  | 17.7  | 7.7   | 13.9  | 14.6  | 10.8  | 9.2   | 14.4  | 18.5 | 26.45 |
| 19  | 26.85       | 21.9      | 17.2  | 18.3  | 21.5  | 17.3  | 17.6  | 19.1  | 15.2  | 20.6  | 19.5  | 16.2  | 13.2  | 16.9  | 22.8  | 10.5  | 6.5   | 15.2  | 14.0  | 15.1  | 21.8  | 13.8  | 11.2  | 17.4  | 14.3  | 11.8  | 13.5  | 16.0 | 26.85 |
| 20  | 29.41       | 49.8      | 23.3  | 33.0  | 36.6  | 36.4  | 28.6  | 22.3  | 27.8  | 49.3  | 41.7  | 26.4  | 21.6  | 24.6  | 21.6  | 17.0  | 44.7  | 5.7   | 42.4  | 6.1   | 21.7  | 23.5  | 9.4   | 10.1  | 15.1  | 13.9  | 14.5  | 6.9  | 29.41 |
| 21  | 30.26       | 16.8      | 20.1  | 19.5  | 21.3  | 18.5  | 18.9  | 19.7  | 18.8  | 19.1  | 17.1  | 20.0  | 17.6  | 19.1  | 13.4  | 6.9   | 11.5  | 14.1  | 9.3   | 11.8  | 16.5  | 0.0   | 10.8  | 7.2   | 0.0   | 15.5  | 0.0   | 0.0  | 30.26 |



|    |       |       |      |      |       |      |      |      |      |       |       |      |      |      |       |      |       |      |      |      |       |      |      |      |      |      |      |      |       |
|----|-------|-------|------|------|-------|------|------|------|------|-------|-------|------|------|------|-------|------|-------|------|------|------|-------|------|------|------|------|------|------|------|-------|
| 22 | 32.29 | 9.3   | 8.3  | 9.0  | 9.5   | 8.6  | 7.9  | 6.9  | 8.5  | 8.8   | 8.8   | 8.0  | 7.6  | 7.7  | 7.7   | 14.3 | 22.3  | 10.0 | 14.7 | 17.5 | 6.1   | 0.0  | 0.0  | 8.2  | 0.0  | 0.0  | 12.9 | 0.0  | 32.29 |
| 23 | 33.19 | 18.8  | 13.9 | 15.7 | 13.2  | 15.0 | 14.9 | 14.9 | 14.3 | 19.0  | 18.3  | 15.1 | 13.9 | 14.3 | 21.9  | 14.4 | 21.0  | 14.1 | 10.1 | 6.7  | 16.8  | 7.1  | 14.1 | 7.3  | 6.0  | 0.0  | 5.8  | 0.0  | 33.19 |
| 24 | 39.47 | 43.8  | 34.0 | 38.1 | 42.1  | 36.0 | 32.6 | 33.2 | 35.8 | 42.0  | 39.8  | 35.3 | 33.6 | 35.6 | 42.5  | 25.7 | 28.9  | 14.8 | 16.6 | 29.6 | 28.7  | 15.3 | 24.6 | 13.9 | 23.9 | 26.6 | 21.2 | 19.2 | 39.47 |
| 25 | 41.44 | 14.0  | 15.0 | 18.2 | 19.4  | 15.1 | 12.7 | 12.8 | 18.2 | 18.6  | 18.7  | 19.7 | 20.5 | 19.7 | 7.2   | 12.1 | 8.4   | 9.3  | 7.5  | 10.4 | 11.6  | 9.9  | 11.1 | 12.0 | 11.2 | 8.1  | 9.7  | 0.0  | 41.44 |
| 26 | 42.98 | 13.1  | 14.8 | 13.4 | 12.0  | 15.8 | 15.8 | 15.5 | 13.5 | 14.4  | 14.9  | 12.7 | 12.3 | 12.9 | 10.3  | 0.0  | 15.8  | 8.0  | 0.0  | 0.0  | 0.0   | 23.1 | 0.0  | 9.6  | 0.0  | 0.0  | 0.0  | 41.8 | 42.98 |
| 27 | 43.96 | 105.7 | 82.2 | 92.7 | 112.2 | 85.4 | 85.5 | 91.3 | 83.3 | 106.3 | 101.4 | 86.0 | 79.8 | 85.7 | 128.8 | 82.6 | 152.5 | 51.3 | 44.9 | 50.2 | 100.9 | 56.2 | 54.5 | 31.0 | 52.1 | 42.2 | 45.9 | 33.4 | 43.96 |
| 28 | 45.33 | 18.3  | 15.6 | 22.8 | 21.8  | 17.6 | 18.8 | 16.4 | 20.8 | 21.0  | 17.4  | 24.2 | 20.4 | 18.0 | 11.9  | 20.0 | 19.0  | 8.6  | 25.4 | 8.1  | 21.3  | 22.0 | 26.3 | 36.9 | 25.7 | 25.0 | 25.2 | 10.4 | 45.33 |
| 29 | 46.96 | 18.6  | 19.2 | 28.5 | 24.1  | 19.1 | 16.2 | 15.6 | 22.8 | 26.2  | 22.8  | 23.4 | 24.9 | 24.1 | 47.6  | 17.1 | 27.6  | 8.8  | 19.3 | 14.9 | 15.9  | 30.0 | 20.1 | 13.8 | 21.1 | 24.8 | 23.1 | 19.0 | 46.96 |
| 30 | 49.81 | 101.0 | 83.8 | 93.4 | 104.5 | 90.3 | 86.3 | 87.2 | 81.7 | 98.2  | 92.0  | 81.4 | 83.5 | 84.5 | 81.6  | 43.7 | 123.8 | 32.1 | 47.0 | 24.6 | 68.5  | 64.2 | 25.0 | 23.9 | 44.9 | 35.8 | 32.9 | 0.0  | 49.81 |
| 31 | 50.77 | 119.9 | 82.7 | 82.5 | 105.4 | 87.8 | 79.4 | 90.8 | 75.7 | 104.2 | 106.0 | 75.5 | 69.6 | 79.5 | 95.5  | 46.5 | 93.4  | 51.2 | 54.9 | 27.5 | 87.3  | 56.3 | 19.9 | 28.0 | 37.7 | 33.8 | 34.1 | 0.0  | 50.77 |
| 32 | 54.31 | 10.0  | 6.9  | 7.5  | 10.2  | 6.6  | 7.0  | 6.1  | 7.0  | 7.5   | 7.7   | 6.6  | 7.3  | 6.8  | 6.4   | 5.2  | 9.2   | 5.1  | 6.6  | 4.4  | 9.7   | 0.0  | 5.9  | 0.0  | 3.8  | 3.8  | 3.2  | 0.0  | 54.31 |
| 33 | 54.90 | 21.0  | 18.6 | 18.3 | 19.9  | 18.5 | 16.9 | 15.9 | 17.0 | 21.0  | 20.0  | 18.5 | 16.7 | 17.5 | 20.0  | 12.4 | 18.8  | 17.9 | 17.1 | 13.4 | 18.5  | 8.9  | 9.8  | 11.6 | 18.0 | 16.2 | 9.9  | 0.0  | 54.90 |
| 34 | 55.16 | 6.9   | 3.6  | 5.5  | 6.6   | 5.9  | 4.9  | 5.1  | 5.1  | 5.2   | 6.4   | 5.4  | 4.5  | 3.7  | 6.3   | 3.4  | 0.0   | 0.0  | 0.0  | 0.0  | 2.5   | 5.6  | 0.0  | 0.0  | 0.0  | 0.0  | 3.2  | 0.0  | 55.16 |
| 35 | 55.49 | 10.0  | 9.1  | 11.0 | 10.4  | 8.3  | 8.3  | 7.9  | 9.2  | 11.0  | 9.9   | 9.5  | 7.7  | 8.9  | 10.0  | 4.6  | 9.8   | 0.0  | 12.6 | 2.8  | 5.9   | 5.6  | 14.0 | 0.0  | 6.8  | 6.9  | 4.4  | 5.1  | 55.49 |
| 36 | 63.35 | 0.0   | 0.0  | 0.0  | 0.0   | 0.0  | 0.0  | 0.0  | 0.0  | 0.0   | 0.0   | 0.0  | 0.0  | 0.0  | 0.0   | 0.0  | 0.0   | 3.9  | 0.0  | 3.4  | 3.9   | 0.0  | 0.0  | 5.3  | 0.0  | 0.0  | 4.5  | 0.0  | 63.35 |
| 37 | 66.45 | 7.0   | 4.8  | 5.4  | 6.0   | 4.7  | 4.9  | 6.1  | 5.0  | 5.3   | 4.6   | 6.2  | 4.8  | 5.4  | 4.4   | 6.3  | 9.3   | 7.8  | 16.8 | 13.0 | 11.7  | 13.7 | 7.7  | 9.2  | 11.4 | 10.4 | 10.1 | 9.6  | 66.45 |
| 38 | 77.61 | 3.6   | 3.4  | 3.5  | 5.3   | 3.1  | 0.0  | 4.4  | 3.6  | 3.9   | 3.7   | 4.1  | 3.9  | 3.4  | 3.1   | 3.8  | 0.0   | 0.0  | 0.0  | 3.7  | 0.0   | 0.0  | 3.4  | 0.0  | 0.0  | 0.0  | 0.0  | 0.0  | 77.61 |

**Table S6** Comparison of different fingerprint processing methods

|                                            | Single-wavelength fingerprint | MFCF     | BFD      |
|--------------------------------------------|-------------------------------|----------|----------|
| Number of common peaks                     | 23                            | 21       | 38       |
| Number of wavelength                       | 1                             | 5        | all      |
| Processing means                           | Manual                        | Manual   | computer |
| Data processing time (per sample)          | Second most                   | Most     | 4 s      |
| Number of origin classification categories | 2                             | 3        | 3        |
| Classification accuracy                    | Less accuracy                 | Accurate | Accurate |
